# Supplementary material for: Hematological parameters in largemouth bass (Micropterus salmoides) with formalin-preservation: comparison between wild tournament-caught and captive-raised fish
Source: PeerJ. 2019 Apr 4;7:e6669. doi: 10.7717/peerj.6669 (PMC6451833; doi:10.7717/peerj.6669)
Supplement: Dataset S1 [file peerj-07-6669-s001.xlsx]

## Sheet: wild-caught
Largemouth Bass (Micropterus salmoides) - Wild Caught
Hemotology Data Sheet
	Morphometrics						Manual hemocytometer counts																	hemocytometer
Fish ID	Weight (kg)	Length (cm)	Health Comments	Blood Volume (mL)	PCV (%)	TS (g/dL)	DATE	RBC 1	RBC 2	RBC 3	RBC 4	RBC 5	RBC MEAN	WBC 1	WBC 2	WBC 3	WBC 4	WBC 5	WBC 6	WBC 7	WBC 8	WBC 9	WBC MEAN	WBC CALCULATION	PLT
1	1.2	45	WNL	1.3	43	6	2017-11-18	207	231	246	210	192	178.8	6	4	6	7	8	6	7	6	4	6	5940	30
2	1	44	Abrasions on tail	1.2	41	5.8	2017-11-18	176	144	160	224	208	182.4	9	7	4	8	9	10	8	8	9	9	7920	20
3	1.4	49	WNL	1.5	53	8.2	2017-11-18	192	288	272	320	320	278.4	9	12	18	13	10	8	8	7	6	10.11	10010	24
4	0.4		Bilateral cloudy eyes	1.8	31	6	2017-11-18	192	176	208	192	240	201.6	11	6	8	8	6	7	9	10	6	7.88	7810	15
5	0.2	38	WNL	1.3	40	5.6	2017-11-18	176	224	224	256	176	211.2	8	4	6	8	4	6	4	3	3	5.11	5060	22
6	0.3	37	Wound on mouth	1.2	42	5.6	2017-11-21	110	100	112	108	115	109	4	3	3	4	5	5	4	4	4	4	3960	14
7	0.2	38.7	WNL	1	45	8.2	2017-11-21	200	205	238	213	243	219.8	5	4	5	3	4	4	6	4	4	4.33	4290	15
8	1.6	50	WNL	1.6	44	7.2	2017-11-21	172	199	223	212	249	211	8	12	5	6	8	4	4	3	2	5.77	5720	19
9	1	41	Bloody mouth	1	39	7.8	2017-11-21	109	146	142	142	141	136	6	8	9	9	6	4	6	4	4	6.22	6160	24
10	0.4	41	Wound dorsal fin	1.6	41	5.8	2017-11-21	170	209	220	187	219	201	6	6	4	8	4	7	4	3	3	5	4950	11
11	0.9	46	WNL	1.6	47	8	2017-11-22	195	249	235	269	219	233.4	9	7	6	5	6	10	8	8	7	7.33	7260	15
12	0.6	38	WNL	1.4	53	7.2	2017-11-22	193	225	217	207	226	213.6	9	11	9	8	10	4	5	6	7	7.66	7590	16
13	0.4	42	WNL	1.1	49	7	2017-11-22	200	189	173	196	236	198.8	4	6	10	5	7	9	3	6	6	6.22	6160	18
14	2	46	WNL	1.1	44	8	2017-12-04	196	208	162	189	194	189.8	10	8	10	13	6	9	7	10	8	9	8910	12
15	0.2	39	WNL	1.5	52	8	2017-12-04	177	196	187	196	208	192.8	14	12	8	11	10	12	8	6	8	10	9990	13
16	0.8	46	Body lesions	1.5	40	6.2	2017-12-04	215	220	207	209	189	208	6	6	10	12	8	9	4	5	5	7.22	7150	18
17	2.2	51	WNL	1.6	48	7.4	***clotted sample, not put in NBF
18	0.3	38	WNL	1	45	8	2017-12-07	115	140	154	146	150	141	6	8	5	2	5	6	4	4	6	5.11	5060	9
19	0.6	40	WNL	1.9	53	7.4	2017-12-07	249	254	243	259	237	248.6	8	11	12	6	11	11	6	6	4	8.33	8250	13
20	1	42	WNL	1.2	45	8.2	2017-12-07	135	134	146	143	111	133.8	4	3	6	5	5	5	6	8	8	5.55	5500	8
21	0.8	38	WNL	1.2	44	8.4	2017-12-07	128	142	172	184	175	160.2	4	6	6	7	4	3	7	4	3	4.88	4840	12
22	1.2	47	WNL	1.3	43	6.4	2017-12-07	161	155	179	174	189	171.6	5	8	6	9	4	7	7	8	9	7	6930	9
23	1.4	47	WNL	1.4	52	9.6	2017-12-11	204	202	228	226	207	213.4	8	8	10	10	14	12	9	8	5	9.33	9240	12
24	1	44	WNL	1.3	50	8	2017-12-11	188	235	208	186	214	206.2	5	5	11	10	8	9	10	7	9	8.22	8140	13
25	0.6	39	WNL	1	44	5.6	2017-12-13	150	205	189	208	192	188.8	12	11	12	13	11	9	6	8	8	10	9900	4
26	1.6	53	WNL	1.7	39	6.6	2017-12-13	158	215	226	200	177	195.2	11	10	6	7	9	14	8	8	6	8.77	8690	17
Manual Differentials
Fish ID	Neutrophils	Lymphocytes	Monocytes	Total WBC Counts	PLT	PLT Counts
1	24	66	10	29100	19	1900
2	9	76	16	23700	15	1500
3	35	58	7	12600	20	2000
4	26	64	10	23700	20	2000
5	53	38	9	55650	18	1800
6	48	41	11	29400	33	3300
7	29	62	9	20850	25	2500
8	15	77	8	33900	18	1800
9	28	67	5	17550	15	1500
10	12	77	11	21000	13	1300
11	33	61	5	23700	8	800
12	15	84	1	33450	16	1600
13	37	55	8	28500	9	900
14	23	69	9	29100	18	1800
15	22	69	9	25200	8	800
16	21	70	9	27450	26	2600
17	12	82	6	24300	12	1200	****no formalin d/t clotting
18	18	74	8	18750	16	1600
19	6	88	6	30000	46	4600
20	37	58	6	20400	34	3400
21	23	64	13	17400	39	3900
22	3	90	7	18000	39	3900
23	32	61	7	17850	28	2800
24	5	87	8	21900	27	2700
25	28	63	10	17550	15	1500
26	33	58	9	22200	36	3600
